# Supplementary material
Source: HighWire-hosted journal article supplement (https://erj.ersjournals.com/content/56/3/1901289)
Supplement: inline-supplementary-material-2 [file inline-supplementary-material-2.pdf]

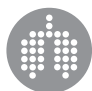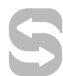

SHAREABLE PDF

# Innate lymphoid cells in isocyanate-induced asthma: role of microRNA-155

Evy E. Blomme <sup>1</sup>, Sharen Provoost<sup>1</sup>, Erica Bazzan<sup>2</sup>,  
Hannelore P. Van Eeckhoutte<sup>1</sup>, Mirjam P. Roffel<sup>1,3</sup>, Lore Pollaris<sup>4</sup>,  
Annelies Bontinck<sup>1</sup>, Matteo Bonato<sup>2</sup>, Louise Vandenbroucke<sup>1</sup>, Fien Verhamme<sup>1</sup>,  
Guy F. Joos <sup>1</sup>, Manuel G. Cosio<sup>2,5</sup>, Jeroen A. J. Vanoirbeek <sup>4</sup>,  
Guy G. Brusselle <sup>1</sup>, Marina Saetta <sup>2</sup> and Tania Maes <sup>1</sup>

**Affiliations:** <sup>1</sup>Dept of Respiratory Medicine, Laboratory for Translational Research in Obstructive Pulmonary Diseases, Ghent University Hospital, Ghent, Belgium. <sup>2</sup>Dept of Cardiac, Thoracic, Vascular Sciences and Public Health, University of Padova, Padova, Italy. <sup>3</sup>University of Groningen, University Medical Center Groningen, GRIAC (Groningen Research Institute for Asthma and COPD), Groningen, The Netherlands. <sup>4</sup>Centre for Environment and Health, KU Leuven, Leuven, Belgium. <sup>5</sup>Meakins Christie Laboratories, Respiratory Division, McGill University, Montreal, QC, Canada.

**Correspondence:** Tania Maes, Dept of Respiratory Medicine, Ghent University Hospital, Medical Research Building (MRB) II, 2nd floor, Corneel Heymanslaan 10, 9000 Ghent, Belgium. E-mail: tania.maes@UGent.be

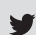

@ERSpublications

Translational research data show that innate lymphoid cells are involved in isocyanate-induced occupational asthma. MicroRNA-155 has a proinflammatory role in a preclinical mouse model, suggesting that it could be a promising therapeutic target <https://bit.ly/2T8JoIP>

**Cite this article as:** Blomme EE, Provoost S, Bazzan E, *et al*. Innate lymphoid cells in isocyanate-induced asthma: role of microRNA-155. *Eur Respir J* 2020; 56: 1901289 [<https://doi.org/10.1183/13993003.01289-2019>].

This single-page version can be shared freely online.

## ABSTRACT

**Background:** Occupational asthma, induced by workplace exposures to low molecular weight agents such as toluene 2,4-diisocyanate (TDI), causes a significant burden to patients and society. Little is known about innate lymphoid cells (ILCs) in TDI-induced asthma. A critical regulator of ILC function is microRNA-155, a microRNA associated with asthma.

**Objective:** To determine whether TDI exposure modifies the number of ILCs in the lung and whether microRNA-155 contributes to TDI-induced airway inflammation and hyperresponsiveness.

**Methods:** C57BL/6 wild-type and microRNA-155 knockout mice were sensitised and challenged with TDI or vehicle. Intracellular cytokine expression in ILCs and T-cells was evaluated in bronchoalveolar lavage (BAL) fluid using flow cytometry. Peribronchial eosinophilia and goblet cells were evaluated on lung tissue, and airway hyperresponsiveness was measured using the forced oscillation technique. Putative type 2 ILCs (ILC2) were identified in bronchial biopsies of subjects with TDI-induced occupational asthma using immunohistochemistry. Human bronchial epithelial cells were exposed to TDI or vehicle.

**Results:** TDI-exposed mice had higher numbers of airway goblet cells, BAL eosinophils, CD4<sup>+</sup> T-cells and ILCs, with a predominant type 2 response, and tended to have airway hyperresponsiveness. In TDI-exposed microRNA-155 knockout mice, inflammation and airway hyperresponsiveness were attenuated. TDI exposure induced IL-33 expression in human bronchial epithelial cells and in murine lungs, which was microRNA-155 dependent in mice. GATA3<sup>+</sup>CD3<sup>-</sup> cells, presumably ILC2, were present in bronchial biopsies.

**Conclusion:** TDI exposure is associated with increased numbers of ILCs. The proinflammatory microRNA-155 is crucial in a murine model of TDI asthma, suggesting its involvement in the pathogenesis of occupational asthma due to low molecular weight agents.
